# Supplementary material for: Ionic contrast across a lipid membrane for Debye length extension: towards an ultimate bioelectronics transducer
Source: Research Square preprint supplement (doi:10.21203/rs.3.rs-96572/v1), 2020-11-04
Supplement: Supplementary file 1 [file 140df389796b3b27d88db568.docx]

**Supplementary Information for**

**Ionic contrast across a lipid membrane for Debye length extension: towards an ultimate bioelectronics transducer**

**Authors:** Donggeun Lee1, 2, Suho Lee3, Eui-Sang Yu1, Taikjin Lee1, Jae Hun Kim1, Hyun Seok Song1, Kwan Hyi Lee4, Seok Lee1, Sang-Kook Han2, Myung Chul Choi3, Yong-Sang Ryu1,*, and Chulki Kim1,*

1Sensor System Research Center, Korea Institute of Science and Technology, Seoul 02792, Republic of Korea.

2Department of Electrical &Electronic Engineering, Yonsei University, Seoul 03722, Republic of Korea.

3Department of Bio and Brain Engineering, Korea Advanced Institute of Science and Technology (KAIST), Daejeon 34141, Republic of Korea.

4Center for Biomaterials, Korea Institute of Science and Technology, Seoul 02792, Republic of Korea.

*Correspondence to: [ysryu82@kist.re.kr](mailto:ysryu82@kist.re.kr); [chulki.kim@kist.re.kr](mailto:chulki.kim@kist.re.kr)

**This file contains following information:**

**1**. Device fabrication and measurement setup (Supplementary Figs. S1-3)

**2**. Lipid preparation and FL measurement

**3**. Buffer solution exchange (Supplementary Fig. S4)

**4**. Control experiment with identical ionic conditions across the SLB (Supplementary Figs. S5-6)

**5**. Minimum molecular mass for the full coverage of the SLB (Eqs. S1-3)

**6**. Langmuir–Nernst isotherm model considering nonspecific bindings (Eq. S4)

**7**. Sensing mechanism and analytical models (Eqs. S5-10, Supplementary Fig. S7, Table S1)

**8**. X-ray reflectivity measurement for electron density fitting (Supplementary Figs. S8-9)

**9**. Chemical potential calculation using the electron density (Eqs. S11-12, Tables S2)

**1. Device fabrication and measurement setup**


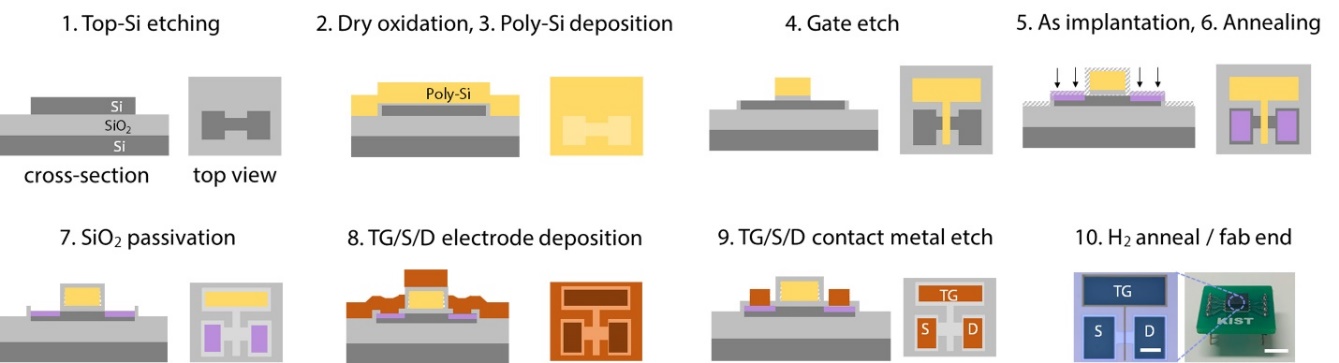


Supplementary Fig. S1. Schematic representation of fabrication of FETs for molecular detection

**Extended gate (EG) fabrication:** The top gate electrode of the FET is wired to an indium tin

oxide (ITO, thickness: 300 nm and resistivity: 5 Ω/sq) electrode. A 80-nm-thick SiO2 layer was deposited on the ITO for bonding the reaction chamber to the ITO electrode. The reaction chamber was made of polydimethylsiloxane (PDMS, Sylgard 184 silicon elastomer kit, Dow Corning). The PDMS mixture (base:curing agent = 10:1) was poured into a Petridish and baked for 12 h at 80°C. After curing, an 8-mm diameter and a 5-mm height hole was formed in the PDMS mold using a biopsy punch. Note that the SiO2 layer plays a bifunctional role here: (1) a surface for forming the supported lipid bilayer (SLB) membrane and (2) serving as a hydrophilic polar silanol (Si-OH) group cross-linked surface for the PDMS chamber via covalent bonding after an oxygen plasma treatment1.

**Importance of disposable EG**: The EG reaction chamber is disposable. This measurement configuration for the EG and the remotely packaged FET allows for reliable data acquisition, eliminating any possible contamination or damage to the active current channel upon direct exposure to target analytes in ionic solution. Moreover, direct comparison between measurements is possible because an identical FET transduces signals from the disposable EG. This is important during quantification of analyte concentration.

**
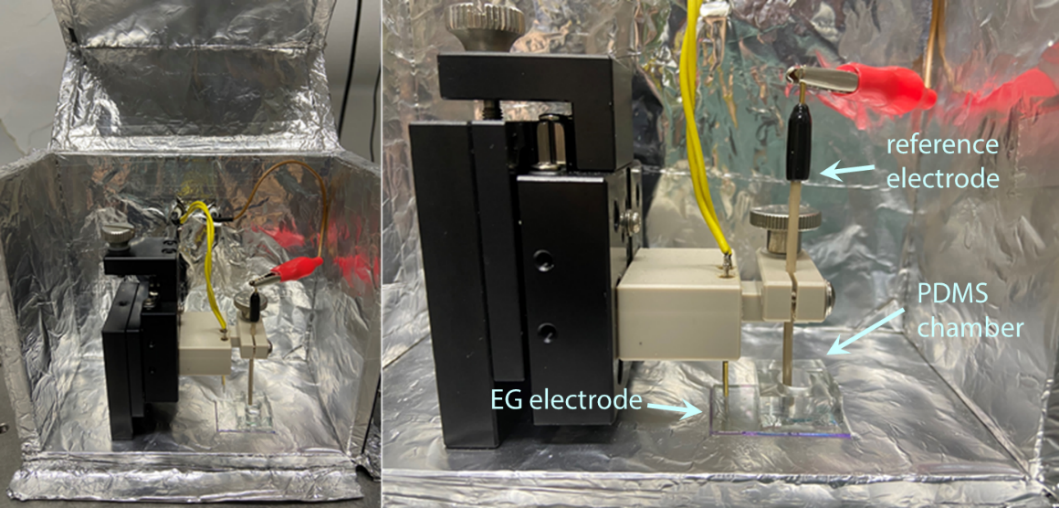
**

**Supplementary** **Fig. S2.** Photograph images of the EG with the reaction chamber placed in a Faraday shielding box

**Bias voltage conditions**: In our measurements, the variation of the surface potential of SiO2 of the EG (Δ*ψ*) is capacitively coupled to VTG, modulating the ID in the FET. The following transfer curve (fig. S3) was used to convert the obtained ID into VTG. The VBG was adjusted to ensure that the top gate response curve has a maximum slope (dID/dVTG) when the application of the VS = 1 V and VBG = 13.5 V (Supplementary Fig. S3).


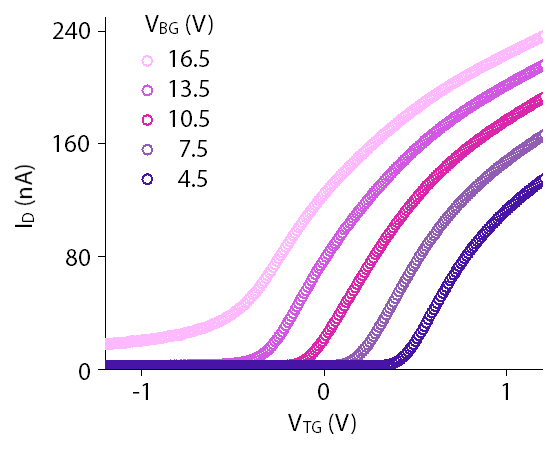


**Supplementary Fig. S3.** ID-VTG curves at various back gate voltages VBG. (VS = 1 V)

**2. Lipid preparation and fluorescence (FL) measurement**

**FL imaging and mobility test:** For the FL imaging, we monitored the SLB using an exposure time of 100 ms and gain 5.8× for every FL micrograph in the SLB coverage experiments. The FL and bright-field (BF) images of particulate materials were monitored using a FL microscopy system (LV100ND, Nikon) and then analyzed using image processing software (ImageJ, National Institutes of Health, USA). For the FRAP test, a 20-μm-circle region of the SLB patch was bleached for 1 min, and time-lapse FL intensities were measured using confocal microscopes (C2 C-ER, Nikon, Japan).

**3. Buffer solution exchange**

After the SLB (DOPC:B-PE = 95:5) preparation in DIW, half of the solution in the EG reaction chamber (50 μL out of 100 μL) was exchanged with 50 μL of 1× PBS. This process was repeated until the VTG value was saturated (Supplementary Fig. S4). Note that the signal reached a steady state after 10 repeated exchanges of the outer buffer (OB), which is consistent with the expected concentrations (0.992× PBS at the 7th exchange and 0.999× PBS at the 10th exchange (Supplementary Fig. S4).


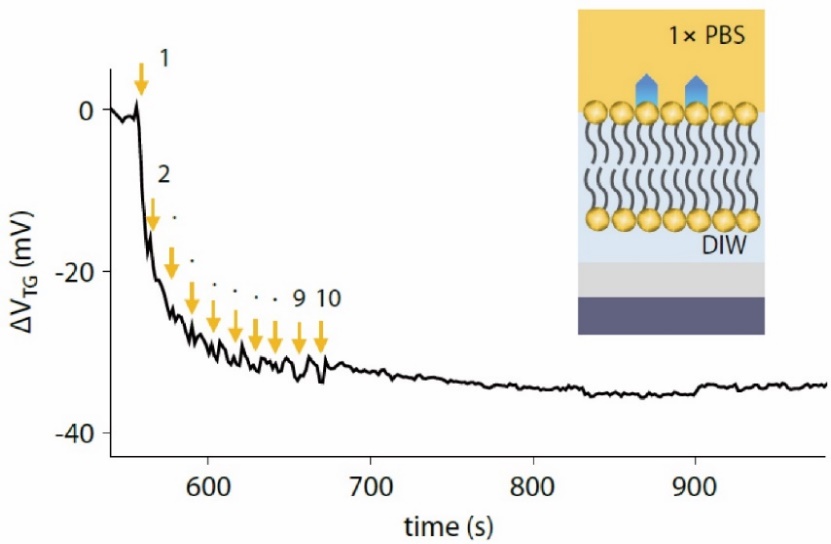


**Supplementary Fig. S4.** Potential variation of the top gate electrode during the OB exchange process with the ionic contrast across the SLB

**4. Control experiment with identical ionic conditions across the SLB**

To validate the role of the DIW layer between the SiO2 surface and the SLB, a negative control experiment was carried out using identical ionic conditions across the SLB. Namely, the SUV was prepared in 1× PBS (0.1 mg/mL) and exposed to the hydrophilic surface of the SiO2 on the EG. Then, the SLB was surrounded by 1×PBS solution. After SLB formation (marker 2 in Supplementary Fig. S5), we waited for at least 5 min for signal stabilization (Supplementary Fig. S5). No signal change was observed after the 800 pM-avidin injection (marker 3 in Supplementary Fig. S5), in contrast to the recognizable Δ*VTG* changes (main manuscript Figs. 3a and 3e), after the 800 pM-avidin injection with high ionic contrast across the SLB. This is mainly attributable to the ultra-thin Debye length (approximately 0.74 nm in 1× PBS), which is thinner than the thickness of the IB (1–2 nm).


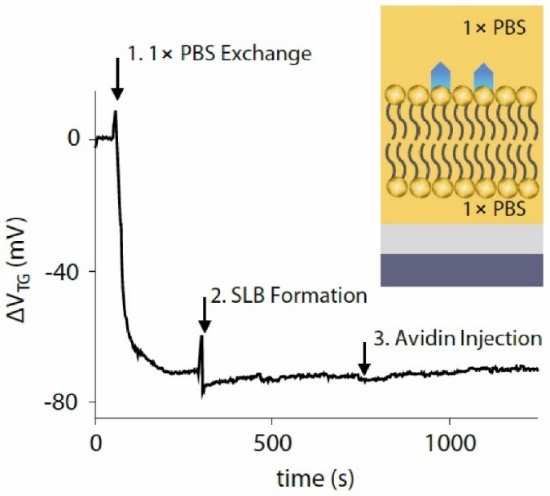


**Supplementary Fig. S5.** Real-time Δ*VTG* measurement of the response to biotin–avidin reactions under identical ionic conditions across the SLB


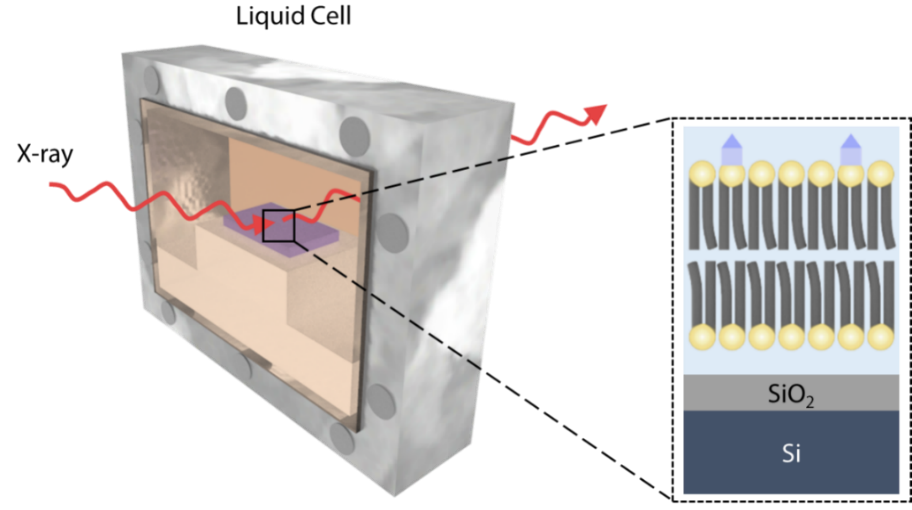


**Supplementary Fig. S6.** Representation of the liquid cell for X-ray reflectivity measurement and the SLB on a SiO2 wafer placed in the cell

**5. Minimum molecular mass for the full coverage of the SLB**

We estimated the required number of lipid molecules to cover the entire surface of the SiO2 and the inside wall of the reaction chamber *AEG*,

(S1)

where *r* and *h* are the diameter and height of the EG chamber, respectively. Considering the head area of DOPC molecules2 (*ASLB* = 72.4 Å2), the required number of DOPC molecules was calculated to be

. (S2)

With an SLB composition of 95/5 = DOPC/B-PE, the averaged mass of the SLB is

. (S3)

This means that full coverage of the EG (the inside PDMS wall and the SiO2 surface) required at least 0.45 *μg* of DOPC/B-PE. Considering that the mass of the lipid in solution was 0.1 *μg* for every drop, the observed saturation after five lipid injections (markers 2 to 6 in main manuscript Fig. 2b) seems reasonable. We confirmed full coverage by casting another drop after signal saturation (marker 7 in the main manuscript Fig. 2b).

**6. Langmuir–Nernst isotherm model considering nonspecific bindings**

SLB provides complete passivation over the EG; therefore, nonspecific binding of suspended analytes is prohibited. To account for results due to nonspecific binding, we conducted an experiment with the EG functionalized by sulfo-NHS-biotin and compared this with the isotherm analysis of the SLB-FET (main manuscript Fig. 3d). The Langmuir–Nernst isotherm model is described as follows:

(S4)

where *Keq,* and *kN* stand for equilibrium constant and nonspecific binding constant, respectively3.

The strong suppression of nonspecific binding in our SLB-FET is described in the main manuscript in Fig. 3d. The measured result (circles in orange in main manuscript Fig. 3d) from our SLB-FET is highly consistent with the conventional Langmuir isotherm model (solid orange line in main manuscript Fig. 3d, *kN*[*A*] = 0). Biotin–avidin binding signals measured with the sulfo-NHS-biotin functionalized EG (circles in grey in main manuscript Fig. 3d) exhibited strong agreement with the Langmuir–Nernst isotherm (solid grey line in main manuscript Fig. 3d). From the fitting, *kN* and *Keq* were calculated to be 3.685 ± 0.754 *mV*/*μM·m* and 54.2 *fM*, respectively, which was within the reasonable range4. Note that our SLB-FET platform allowed for negligence of the second term, whereas protein bindings without SLB should take into account the possibility of nonspecific binding.

**7. Sensing mechanism and analytical models**

Molecular detection using FETs is based on conductivity changes in response to variance in the gate potential. In our case, using an n-type channel for FET and applying a positive gate voltage leads to accumulation of carriers. When analytes bind to receptors on the SLB, the charge density variation in the SiO2 layer changes the top gate voltage, and eventually the conductance in the FET. The time-dependent top gate voltage induced by adsorbed molecules is described by Eq. S5,

(S5)

where [*AB*] is the density of an adsorbed analyte.

In general, the binding kinetics of the receptor when capturing an analyte in solution can be described as follows:

(S6)

where *kM* is a diffusion-limiting rate constant, *k1* and *k-1* are association and dissociation rate constants, respectively, and [*A*]s is the surface concentration of an analyte5. We assumed the fast mixing model ([*A*]*S* = [*A*]) to describe our SLB-FET system, because the *k1* in the biotin–avidin reaction (105 to 107 M-1s-1) is two or more orders of magnitude smaller than the *kM* (~109 M-1s-1) for diffusion limited reactions6. In other words, we suppose that the analyte concentration at the surface remains almost the same as in the bulk in the following analysis. With this, the reaction can be described in a simpler fashion by the first order Langmuir equation (Eq. S7a).

(S7a)

Then, the density of the adsorbed analyte is explicitly expressed by Eq. S7b.

(S7b)

By combining Eqs. S5 and S7b, the time-dependent voltage variation is described by Eq. S8,

. (S8)

In our measurements, the target analyte in solution is dropped in the reaction chamber; therefore, this inevitably leads to a sudden increase in the ionic concentration in the outer buffer. Thus, the top gate potential should reflect relaxation behavior via thermal diffusion. We model its transient state towards equilibrium by a resistor–capacitor (RC) circuit model as in Eq. S9.

(S9)

Where the peak voltage *Vp* is the difference between *qA*[*B*]*max/CTG* and the maximum value of Δ*VTG*(*t*), τ1 and τ2 are RC time constants, and *T* is an effective duration for the sudden increase in the ionic concentration in the outer buffer.

Finally, the measured signal should be the superposition of these responses described above (Eqs. S8 and S9).

(S10)

Supplementary figure S7 shows the response curve for 100 *pM*-avidin binding over the SLB (DOPC:B-PE = 95:5), fitted to our suggested theory model. From these fittings, important reaction parameters are obtained. Those parameters are summarized in Table S1.


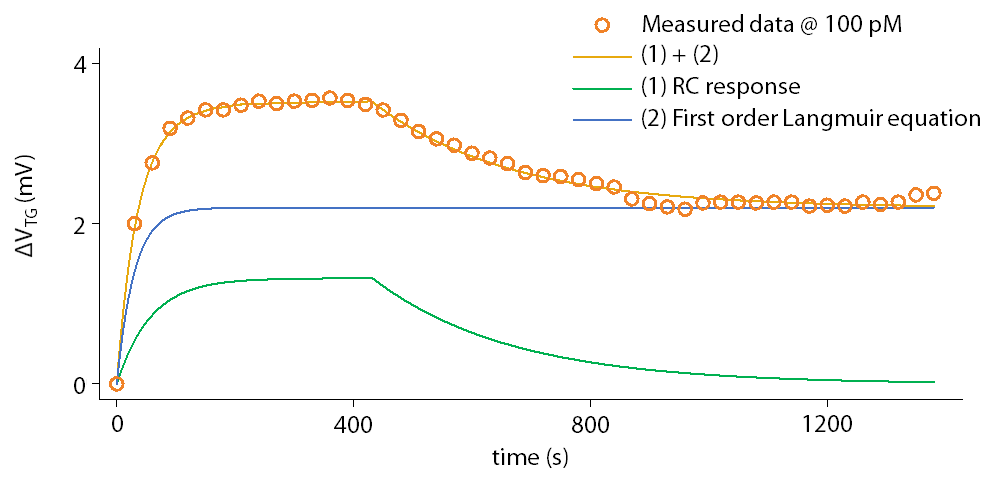


**Supplementary Fig. S7.** Real-time top gate voltage variation in response to 100 *pM*-avidin fitted by an RC circuit model and the first order Langmuir equation

**Table S1. Fitting parameters in Eq. S10**

|  | *Vp*  (*mV*) | *τ1*  (*sec*) | *Veq*  (*V*) | *k1*  [×107*M-1s-1*] | *k-1*  [×10-2*s-1*] | *τ2*  (*sec*) | *T*  (*sec*) |
| --- | --- | --- | --- | --- | --- | --- | --- |
| 100 *pM* | 1.3200 | 29.682 | 0.0022 | 1.6835 | 1.0469 | 231.790 | 432.984 |
| 1 *nM* | 0.7802 | 12.971 | 0.0053 | 1.6642 | 1.0350 | 106.525 | 219.648 |
| 5 *nM* | - | - | 0.0079 | 1.6606 | 1.0311 | - | - |
| 10 *nM* | - | - | 0.0088 | 1.6227 | 1.0010 | - | - |
| 100 *nM* | - | - | 0.0089 | 1.7163 | 1.0410 | - | - |

**8. X-ray reflectivity measurement for electron density fitting**

**
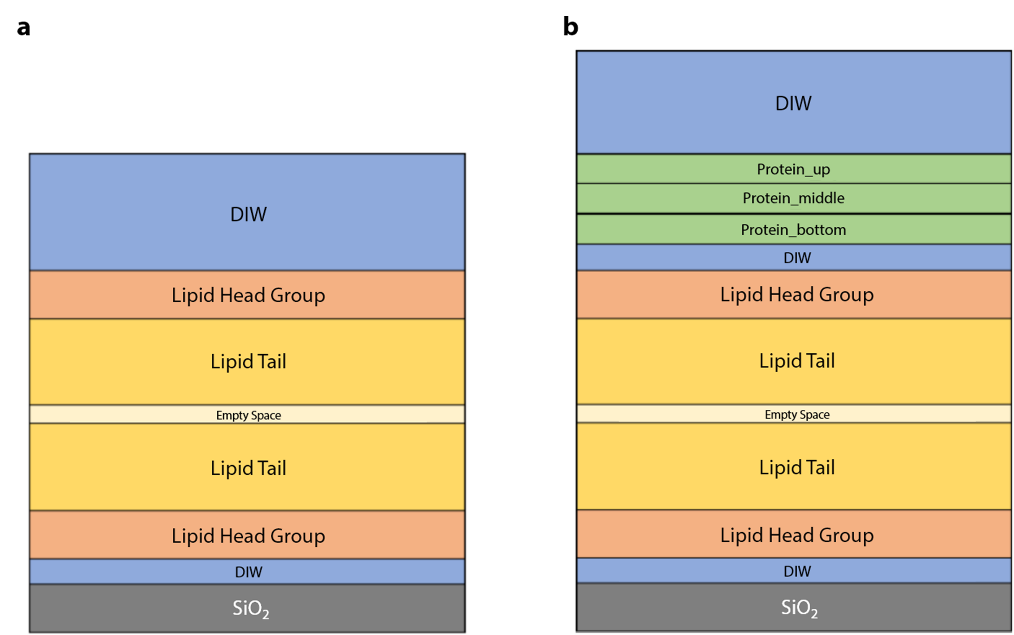
**

**Supplementary Fig. S8. Structure for a slab model. a**,the SLB and **b**,the SLB with a layer of avidin molecules

**
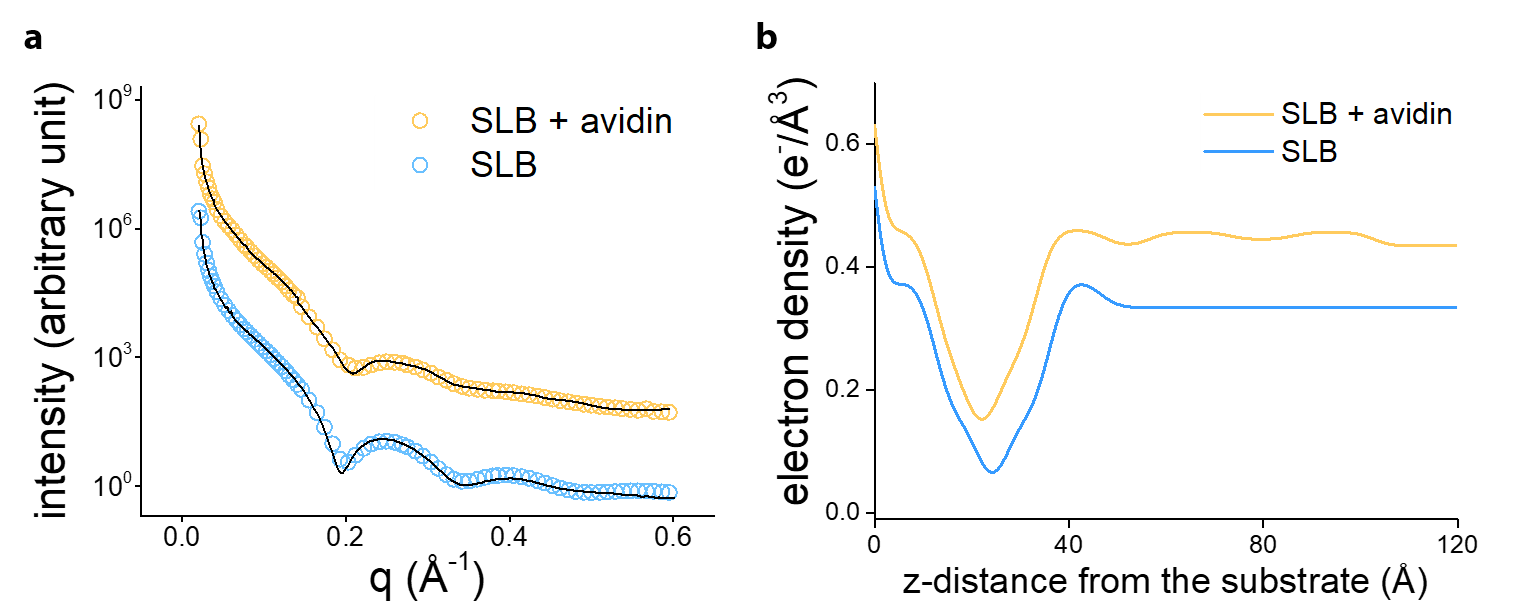
**

**Supplementary Fig. S9. X-ray intensities and electron density profiles of SLB (blue) and SLB with avidin (yellow).** **a**, X-ray reflectivity intensities and their fittings. **b**, Electron density curves along the z-direction.

As shown in fig. S9a, both measurements of SLB and SLB with avidin were well fitted by the model described above. Slight deviation at high q regime (>0.5 Å-1) is due to the low peak intensity. The electron density plots in fig. S9b clearly exhibit the typical electron density curve of SLB, showing consistency with the literature in terms of the size of the conjugated avidin2 (~50 Å).

**9. Chemical potential calculation using the electron density**

Poisson’s equation (Eq. S11) was applied to calculate electric potential variation due to the redistribution of the charge density in the lipid membrane7, 8, 9.

(S11)

The chemical potential at the SiO2 surface was calculated by integrating the charge density (Δ*ρ* = *ρSLB* - *ρSLB+avidin*), and multiplied by the area of SLB film (π × R2 ≈ 5.027 × 10-5 *m2*) assuming in-plane homogeneity.

(S12)

As seen in the main manuscript Fig. 4d, the obtained signal mainly originates from the charge density change in proximity of the SiO2 surface because the chemical potential is inversely proportional to the distance squared.

**Table S2. Electric parameters of FET-SLB circuit components**

|  | *CEG* | *CTG* | *CBG* | *CSLB* |
| --- | --- | --- | --- | --- |
| Dielectric constant (*εr*) | 3.9 | 3.9 | 3.9 | 1.9 |
| Area (*m2*) | 5.03E-05 | 1.50E-10 | 1.50E-10 | 5.03E-05 |
| thickness (*m*) | 8.00E-08 | 1.50E-08 | 7.50E-07 | 5.00E-09 |
| Capacitance (*F*) | 2.17E-08 | 3.45E-13 | 6.91E-15 | 4.36E-06 |
| Voltage (*V*) | 2.18E-07 | 1.37E-02 | 6.83E-01 | 1.08E-09 |

**References**

1. Y. S. Ryu *et al.*, Kinetics of lipid raft formation at lipid monolayer-bilayer junction probed by surface plasmon resonance. *Biosens. Bioelectron.* **142**, 111568 (2019).

2. N. Kucerka, S. Tristram-Nagle, J. F. Nagle, Structure of fully hydrated fluid phase lipid bilayers with monounsaturated chains. *J. Membrane Biol.* **208**, 193-202 (2005).

3. L. Maletinska et al., Human glioblastoma cell lines: Levels of low-density lipoprotein receptor and low-density lipoprotein receptor-related protein. *Cancer Res.* **60**, 2300-2303 (2000).

4. R. A. Kohanski, M. D. Lane, Monovalent avidin affinity columns. *Methods Enzymol.* **184**, 194-200 (1990).

5. X. Duan et al., Quantification of the affinities and kinetics of protein interactions using silicon nanowire biosensors. *Nat. Nanotechnol.* **7**, 401-407 (2012).

6. R. F. Delgadillo *et al.*, Detailed characterization of the solution kinetics and thermodynamics of biotin, biocytin and HABA binding to avidin and streptavidin. *PLoS One* **14**, e0204194–e0204194 (2019).

7. I. D. Mayergoyz, Solution of the nonlinear Poisson equation of semiconductor-device theory. *J. Appl. Phys.* **59**, 195-199 (1986).

8. H. J. Shen *et al.*, Molecular dynamics simulations of ether- and ester-linked phospholipid Bilayers: A comparative study of water models. *J. Phys. Chem. B* **122**, 9399-9408 (2018).

9. K. E. Forsten, R. E. Kozack, D. A. Lauffenburger, S. Subramaniam, Numerical solution of the nonlinear Poisson-Boltzmann equation for a membrane-electrolyte system. *J. Phys. Chem.* **98**, 5580-5586 (1994).
